# Supplementary material for: Aryl group transfer and C–P bond formation in the reaction of organonickel complexes with sodium 3,4,5-triphenyl-1,2-diphospholide
Source: Royal Society of Chemistry journal article supplement (doi:10.1039/d3nj04924h), 2023-12-13
Supplement: d3nj04924h1.pdf [file d3nj04924h1.pdf]

## Supplementary Information for:

### **Aryl group transfer and C-P bond formation in the reaction of organonickel $\sigma$ -complexes with sodium 3,4,5-triphenyl-1,2-diphospholide**

*I.F. Sakhapov<sup>1</sup>, A.A. Zagidullin<sup>1,5\*</sup>, Z.N. Gafurov<sup>1</sup>, D.K. Khismatova<sup>1,2</sup>, R.B. Zaripov<sup>3,6</sup>, A.A. Kagilev<sup>1,2</sup>, A.O. Kantyukov<sup>1,2</sup>, E.M. Zueva<sup>1,4</sup>, M.M. Petrova<sup>4</sup>, I.A. Litvinov<sup>1</sup>, V.A. Miluykov<sup>1</sup>, A.G. Shmelev<sup>3</sup>, O.G. Sinyashin<sup>1</sup>, D.G. Yakhvarov<sup>1,2\*</sup>*

<sup>1</sup> *Arbuzov Institute of Organic and Physical Chemistry, FRC Kazan Scientific Center, Russian Academy of Sciences, Arbuzov Street 8, Kazan, 420088, Russia*

<sup>2</sup> *Alexander Butlerov Institute of Chemistry, Kazan Federal University, Kremlyovskaya Street 18, Kazan, 420008, Russia*

<sup>3</sup> *Zavoisky Physical-Technical Institute, FRC Kazan Scientific Center, Russian Academy of Sciences, Sibirsky Tract 10/7, Kazan, 420029, Russia*

<sup>4</sup> *Department of Inorganic Chemistry, Kazan National Research Technological University, Karl Marx Street 68, Kazan, 420015, Russia*

<sup>5</sup> *Institute of Fundamental Medicine and Biology, Kazan Federal University, Kremlyovskaya Street 18, Kazan, 420008, Russia*

<sup>6</sup> *Institute of Physics, Kazan Federal University, Kremlyovskaya Street 18, Kazan, 420008, Russia*

*e-mail: [zagidullin@iopc.ru](mailto:zagidullin@iopc.ru), [yakhvar@iopc.ru](mailto:yakhvar@iopc.ru)*

## Table of contents

|                                                                                                 |     |
|-------------------------------------------------------------------------------------------------|-----|
| 1. Experimental $^{31}\text{P}$ , $^1\text{H}$ , $^{13}\text{C}$ NMR spectra for <b>4</b> ..... | S3  |
| 2. Experimental $^{31}\text{P}$ , $^1\text{H}$ , $^{13}\text{C}$ NMR spectra for <b>5</b> ..... | S5  |
| 3. Experimental $^{31}\text{P}$ , $^1\text{H}$ , $^{13}\text{C}$ NMR spectra for <b>6</b> ..... | S7  |
| 4. Gas chromatography mass spectrometry (GC/MS) for <b>4-6</b> .....                            | S9  |
| 5. Experimental IR spectra for <b>4-6</b> .....                                                 | S11 |
| 6. X-ray diffraction experiment and molecular structure for <b>4</b> .....                      | S13 |
| 7. Solid-state excitation and emission spectra of compounds <b>4-6</b> .....                    | S15 |
| 8. ESR spectra of obtained in the reaction Ni(0)-species.....                                   | S17 |
| 9. ESI-MS of reaction intermediate (IM) .....                                                   | S18 |
| 10. Quantum-chemical calculations .....                                                         | S19 |
| References .....                                                                                | S21 |

1. Experimental  $^{31}\text{P}$ ,  $^1\text{H}$ ,  $^{13}\text{C}$  NMR spectra for **4**.

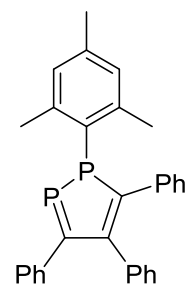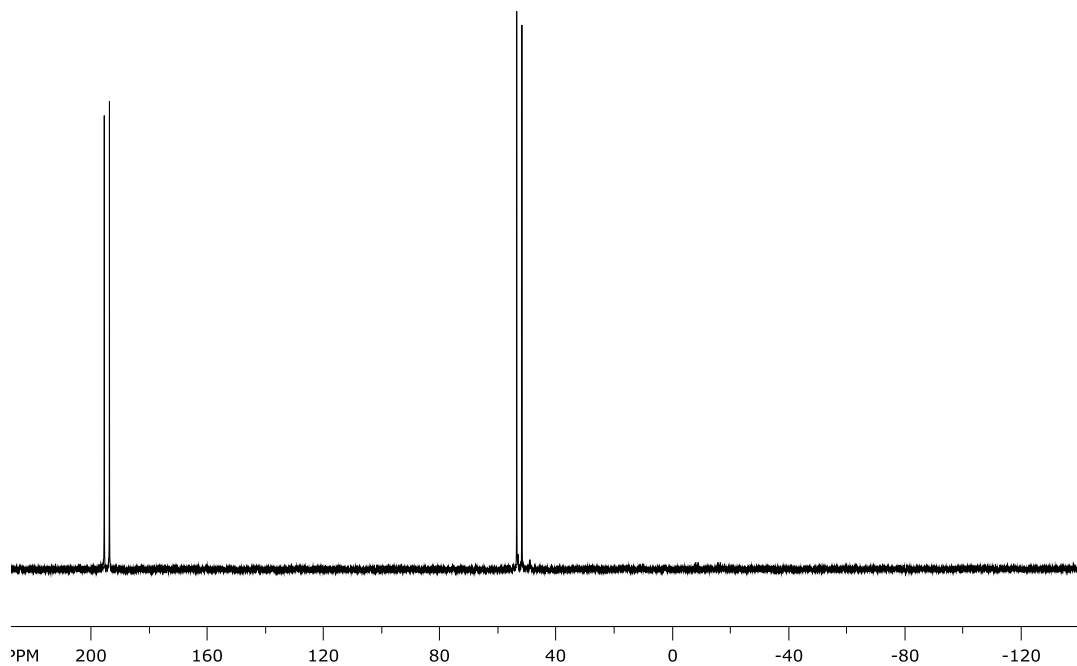

Figure S1.  $^{31}\text{P}\{^1\text{H}\}$  NMR spectrum of **4** in  $\text{CDCl}_3$ .

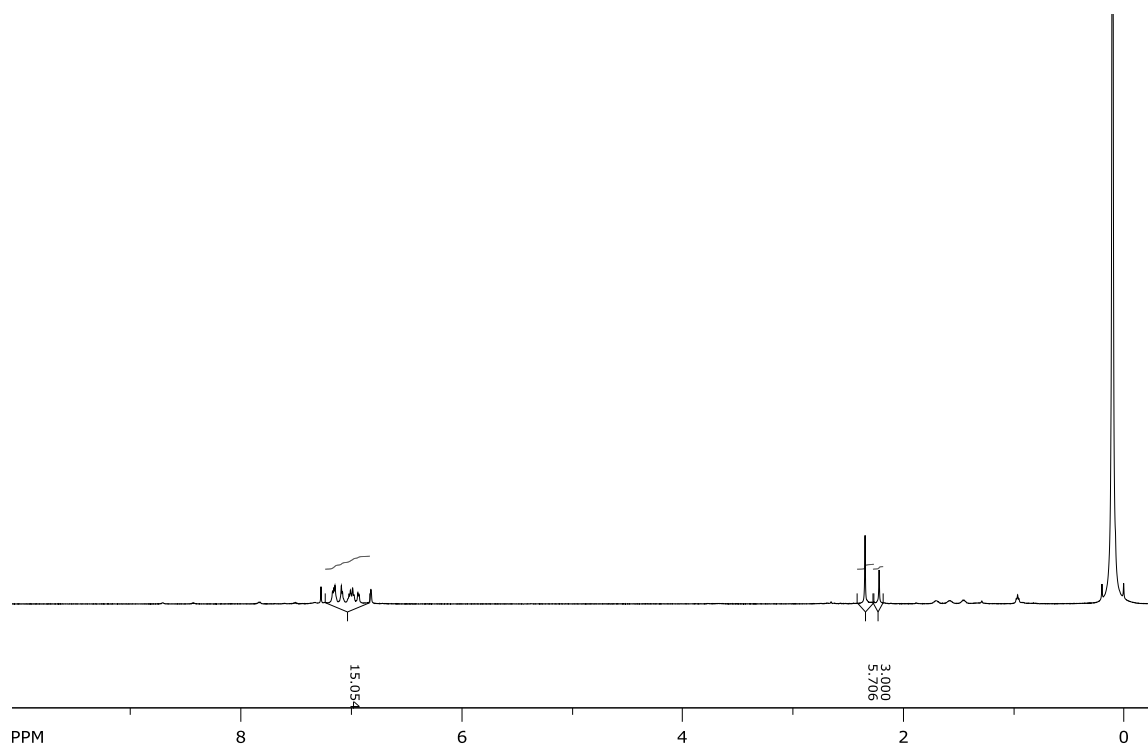

Figure S2.  $^1\text{H}$  NMR spectrum of **4** in  $\text{CDCl}_3$ .

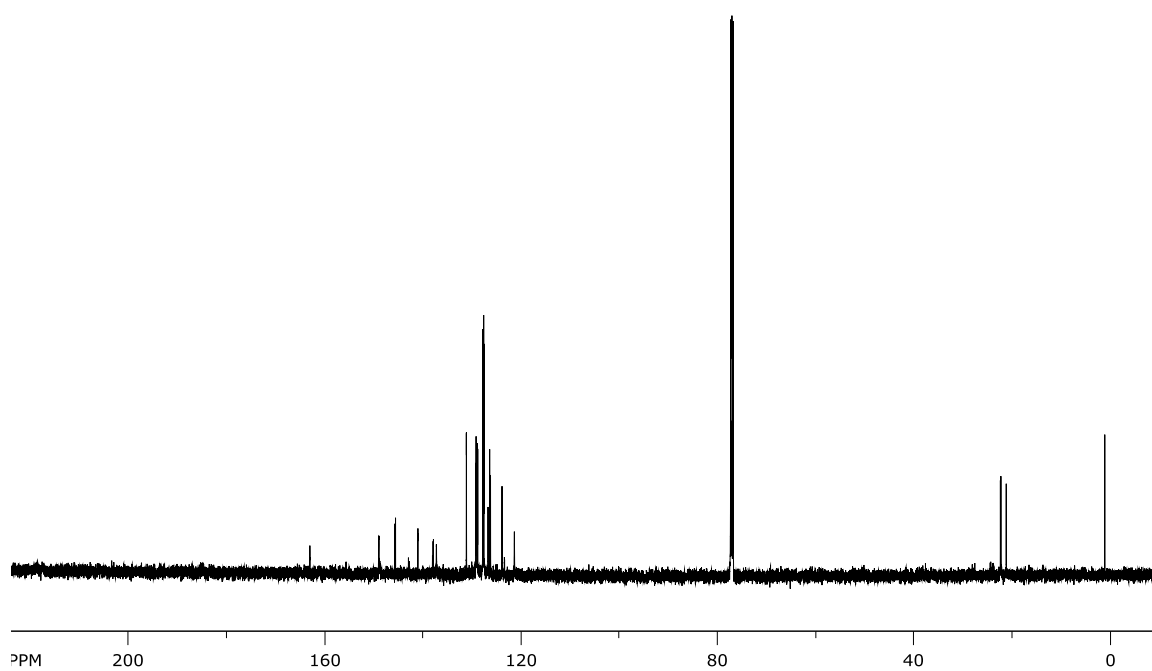

**Figure S3.**  $^{13}\text{C}\{^1\text{H}\}$  NMR spectrum of **4** in  $\text{CDCl}_3$ .

## 2. Experimental $^{31}\text{P}$ , $^1\text{H}$ , $^{13}\text{C}$ NMR spectra for **5**.

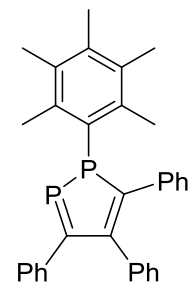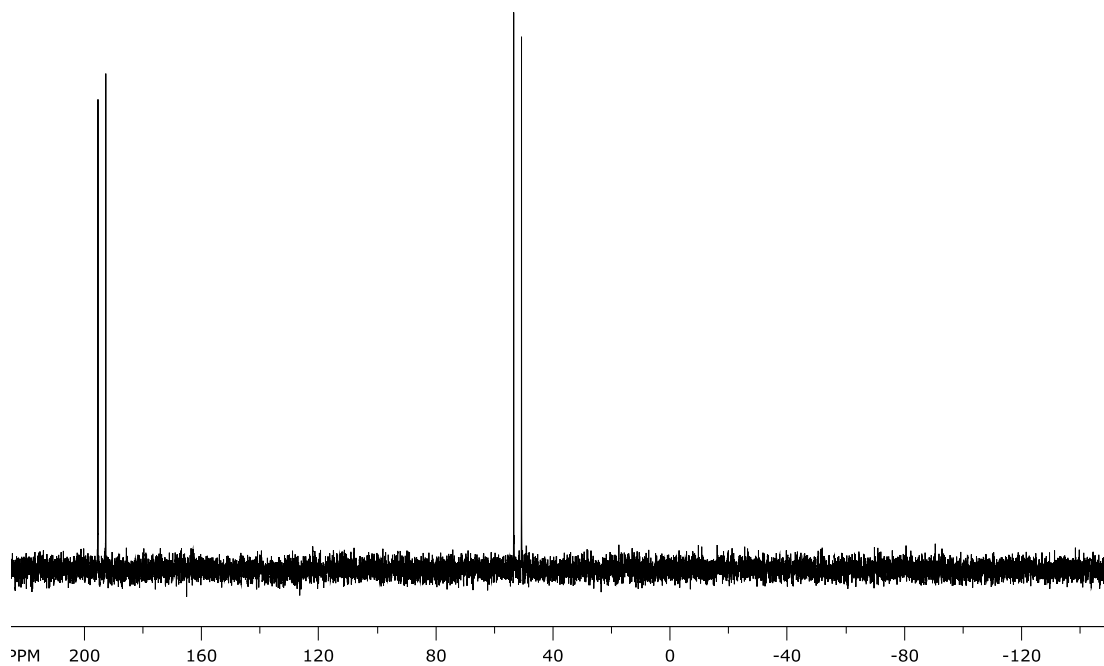

**Figure S4.**  $^{31}\text{P}\{^1\text{H}\}$  NMR spectrum of **5** in  $\text{CDCl}_3$ .

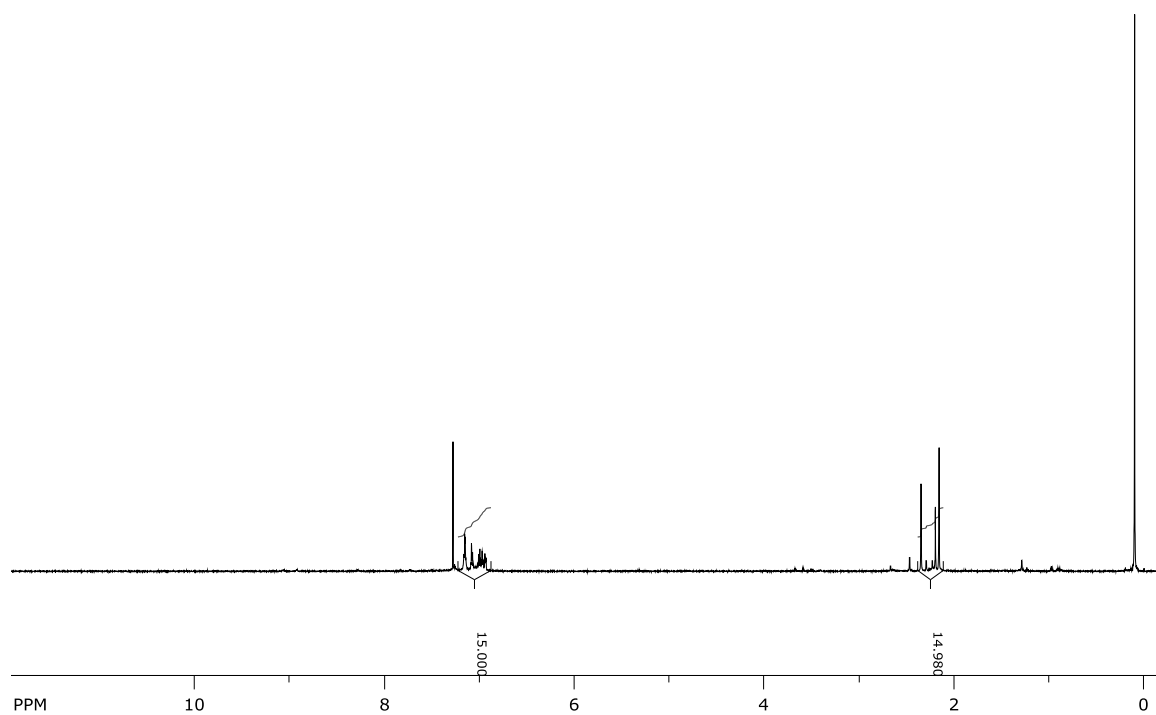

**Figure S5.**  $^1\text{H}$  NMR spectrum of **5** in  $\text{CDCl}_3$ .

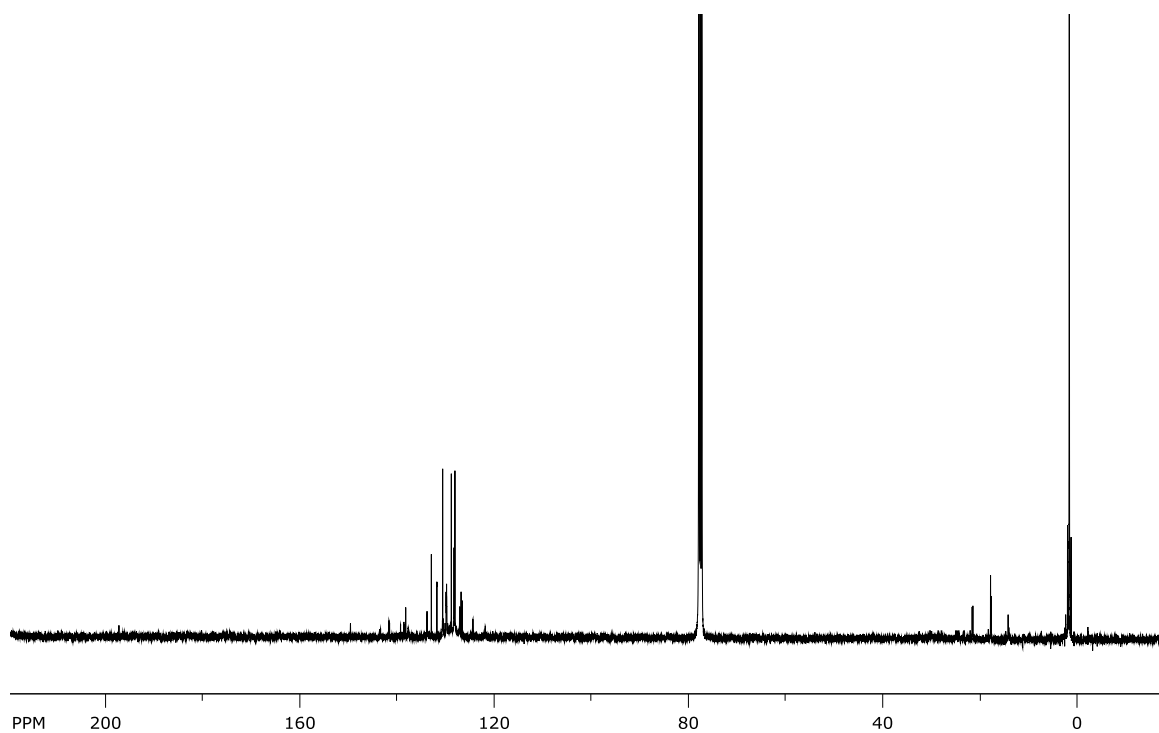

**Figure S6.**  $^{13}\text{C}\{^1\text{H}\}$  NMR spectrum of **5** in  $\text{CDCl}_3$ .

### 3. Experimental $^{31}\text{P}$ , $^1\text{H}$ , $^{13}\text{C}$ NMR spectra for **6**.

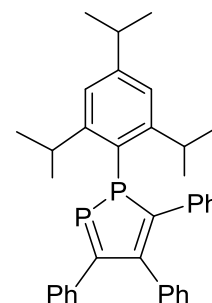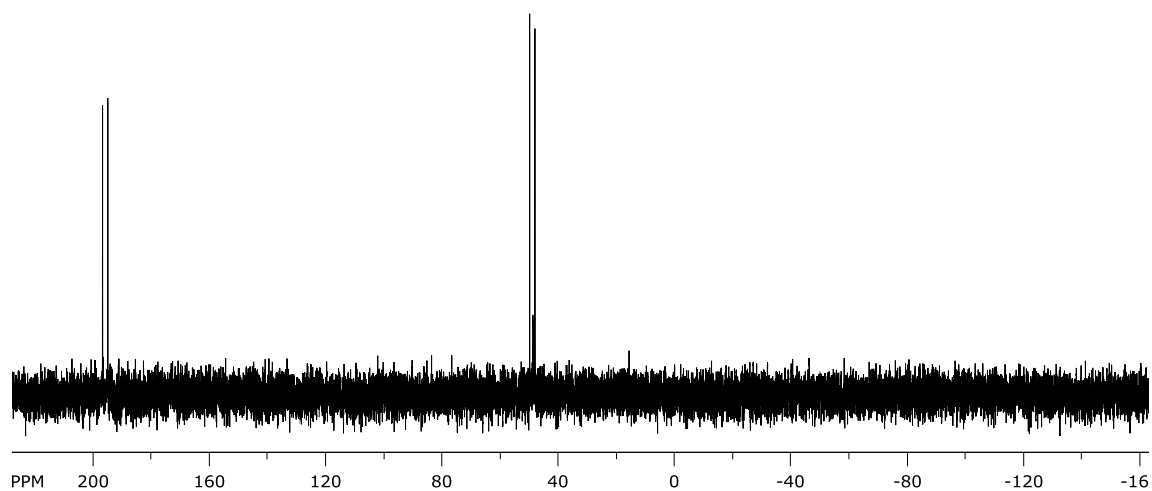

**Figure S7.**  $^{31}\text{P}\{^1\text{H}\}$  NMR spectrum of **6** in  $\text{CDCl}_3$ .

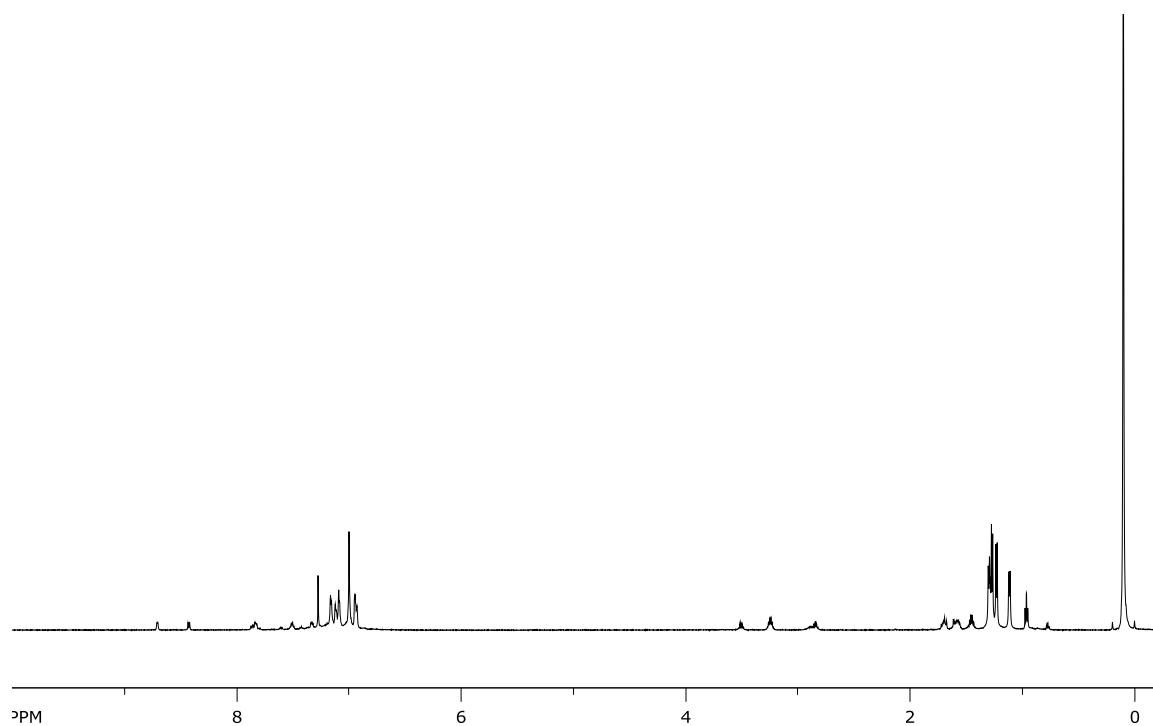

**Figure S8.**  $^1\text{H}$  NMR spectrum of **6** in  $\text{CDCl}_3$ .

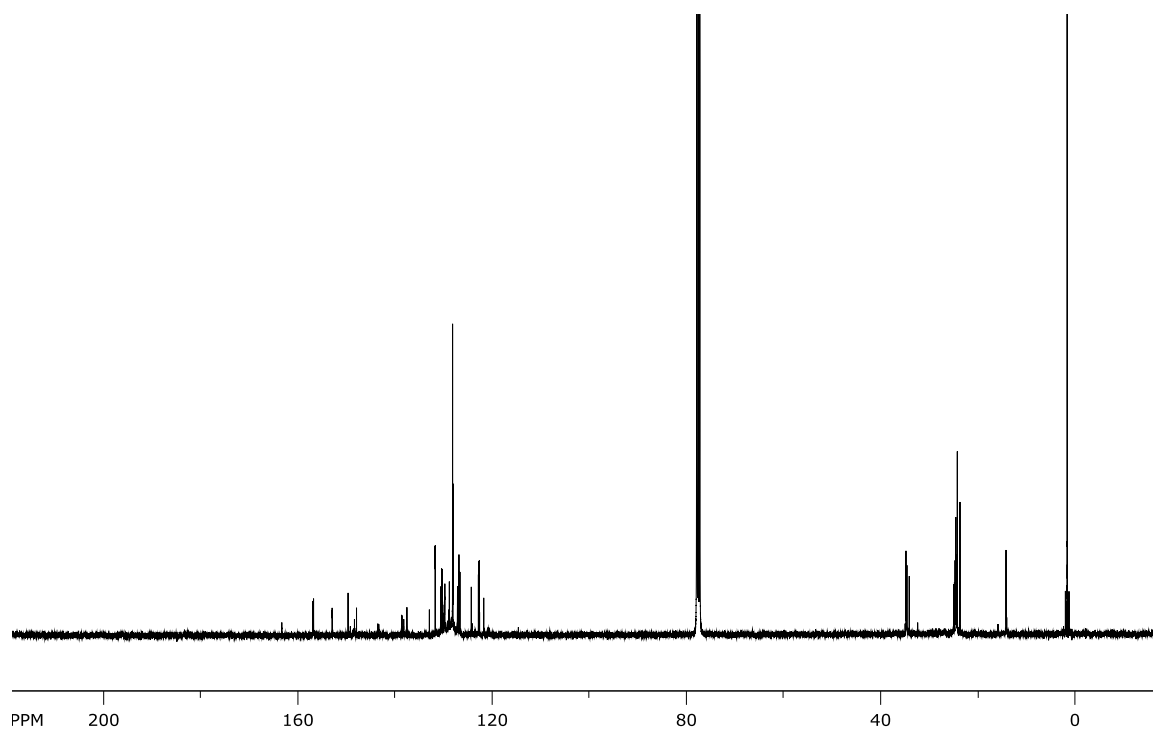

**Figure S9.**  $^{13}\text{C}\{^1\text{H}\}$  NMR spectrum of **6** in  $\text{CDCl}_3$ .



#### 4. Gas chromatography mass spectrometry (GC/MS) for 4-6.

GC/MS proves the formation of **4-6** in each case. The signals of molecular ions with  $m/z$  448 (**4**),  $m/z$  476 (**5**) and  $m/z$  532 (**6**) were detected in the electron ionization (EI) mass spectra.

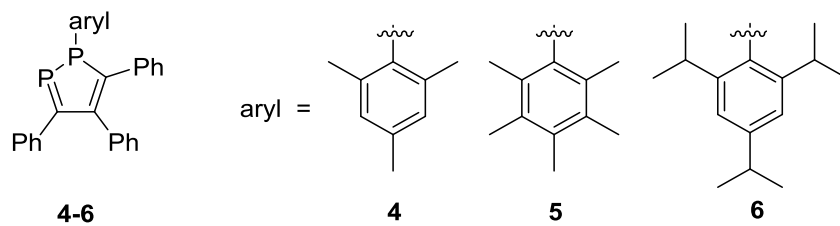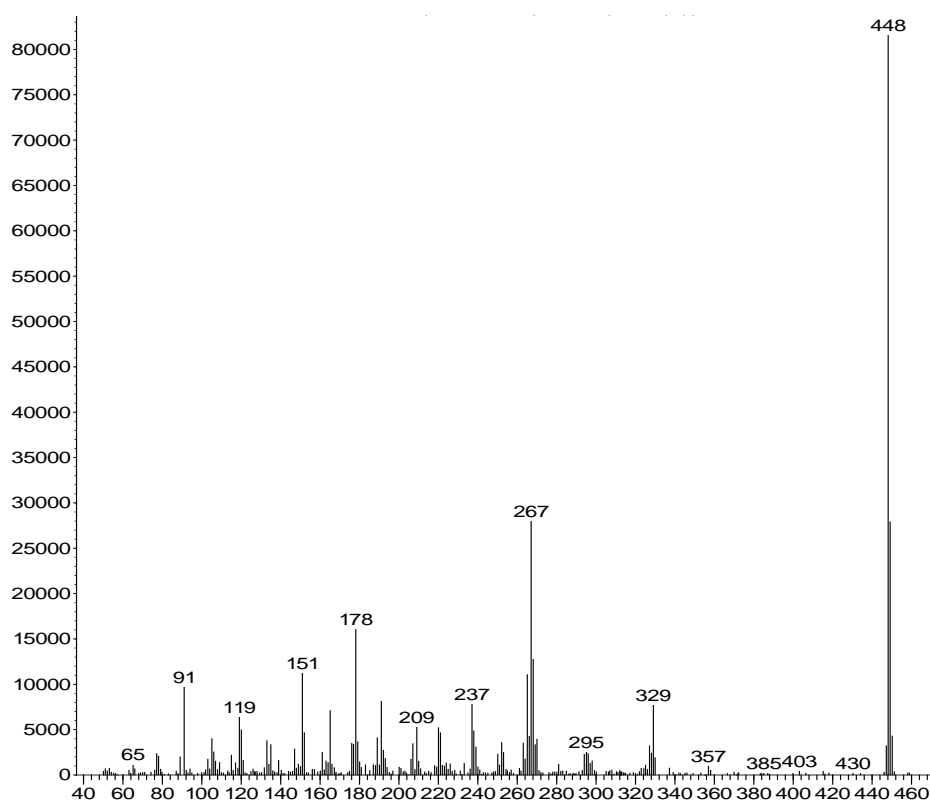

**Figure S10.** EI mass spectra of compound **4**.

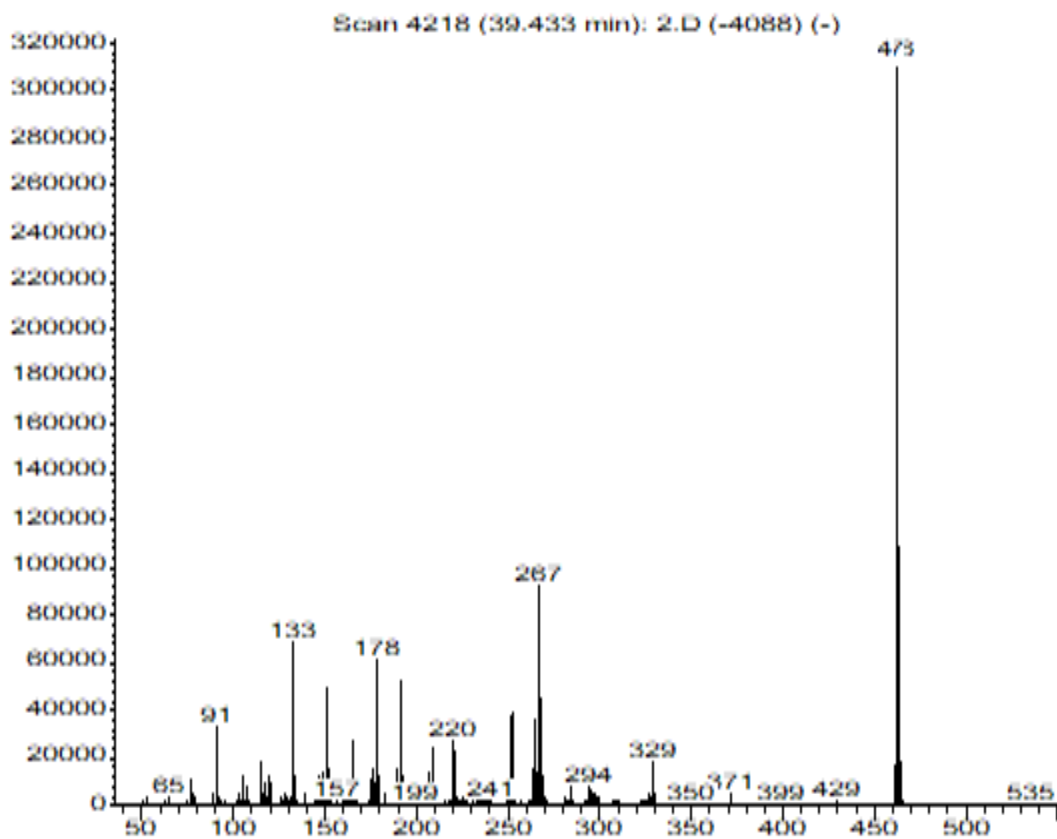

**Figure S11.** EI mass spectra of compound 5.

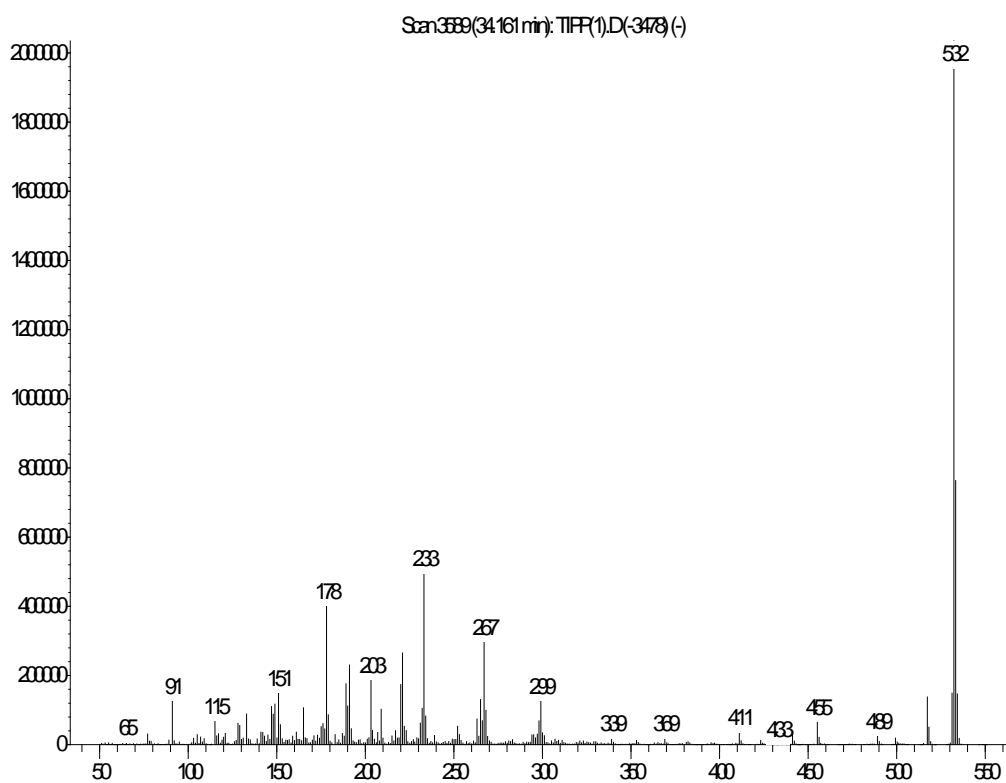

**Figure S12.** EI mass spectra of compound 6.

## 5. Experimental IR spectra for 4-6.

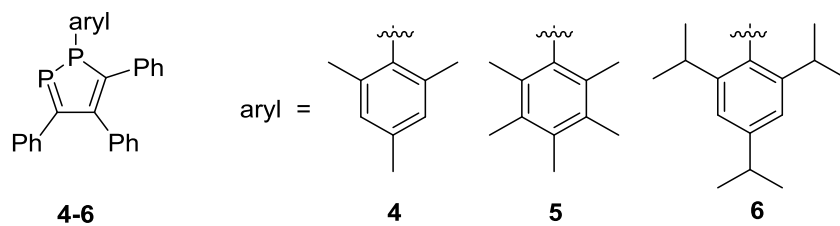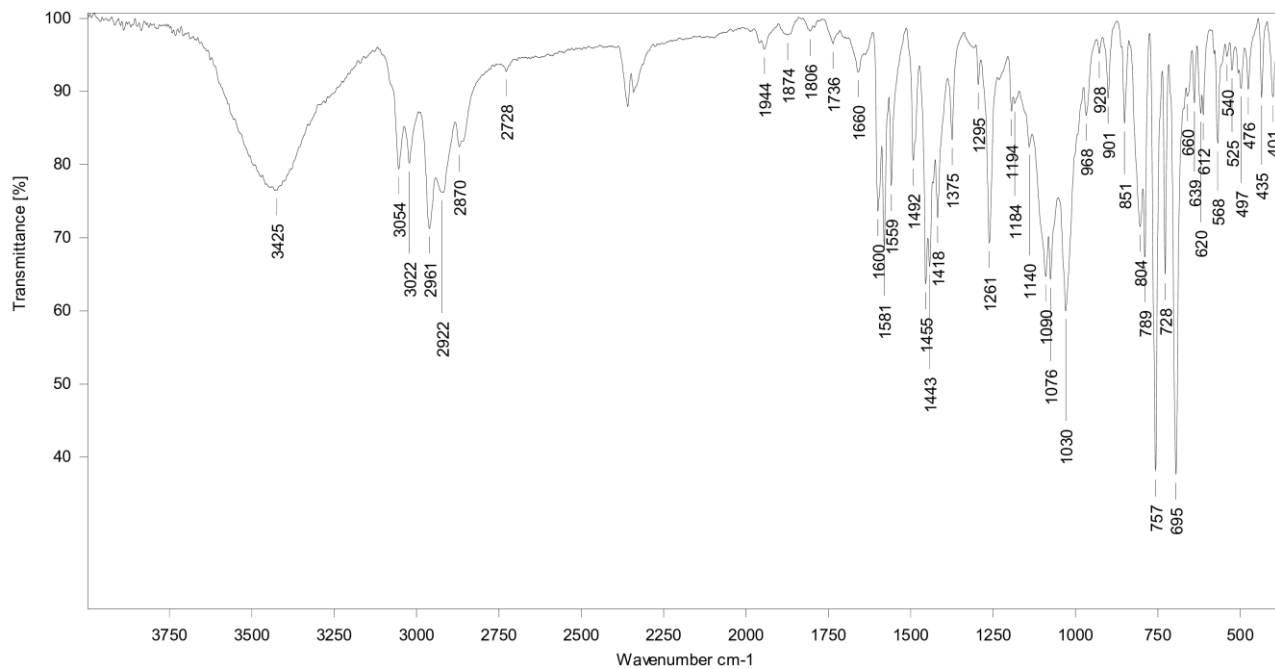

Figure S13. IR spectrum of compound 4.

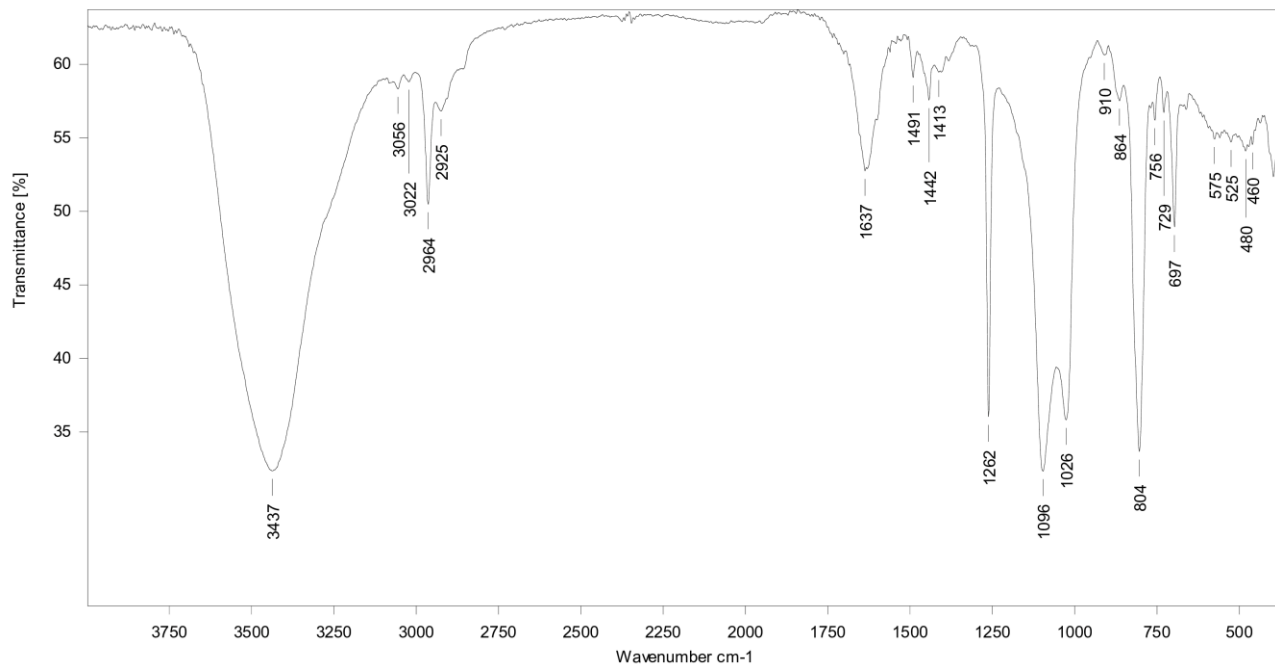

**Figure S14.** IR spectrum of compound 5.

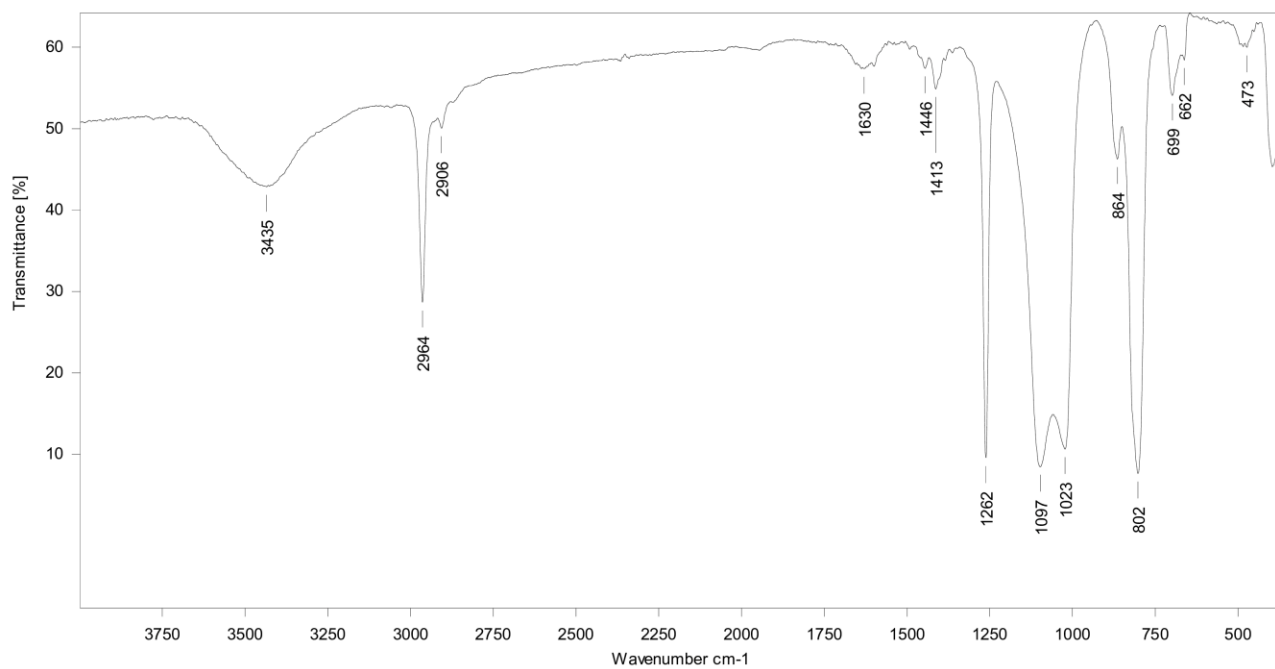

**Figure S15.** IR spectrum of compound 6.

## 6. X-ray diffraction experiment and molecular structure for 4.

**Table S1.** Crystal parameters of compound **4** and conditions of X-ray diffraction experiment.

| Parameter                             | <b>4</b>                                                                                                                      |
|---------------------------------------|-------------------------------------------------------------------------------------------------------------------------------|
| Color, habit                          | Yellow, formless                                                                                                              |
| Crystal dimensions, mm                | 0.40 × 0.20 × 0.15                                                                                                            |
| Moiety Formula                        | C <sub>30</sub> H <sub>26</sub> P <sub>2</sub> , 0.5(C <sub>10</sub> H <sub>8</sub> N <sub>2</sub> )                          |
| Sum Formula                           | C <sub>35</sub> H <sub>30</sub> NP <sub>2</sub>                                                                               |
| Molecular mass                        | 471.75                                                                                                                        |
| Crystal System                        | monoclinic                                                                                                                    |
| Space group                           | C2/c (№ 15)                                                                                                                   |
| Cell parameters, Å, angles, deg       | $a = 24.2770(8)$ ,<br>$b = 15.3360(6)$ ,<br>$c = 17.4979(11)$ ,<br>$\alpha = 90$ ,<br>$\beta = 119.683(1)$ ,<br>$\gamma = 90$ |
| Cell volume, Å <sup>3</sup>           | 5659.8(5)                                                                                                                     |
| Z                                     | 8                                                                                                                             |
| D(calc) [g/cm <sup>3</sup> ]          | 1.236                                                                                                                         |
| $\mu$ (MoKa) [ /mm ]                  | 0.178                                                                                                                         |
| Absorption correction                 | multi-scan                                                                                                                    |
| Radiation ( $\lambda$ , Å)            | MoK $\alpha$ , 0.71073                                                                                                        |
| F(000)                                | 2216                                                                                                                          |
| Reflections measured                  | 100232                                                                                                                        |
| Independent reflections               | 7592                                                                                                                          |
| R(int)                                | 0.076                                                                                                                         |
| Observed reflections $I > 2\sigma(I)$ | 6325                                                                                                                          |

|                                                         |                                                                        |
|---------------------------------------------------------|------------------------------------------------------------------------|
| R-factors, $I > 2\sigma(I)$                             | $R^1 = 0.0385,$<br>$wR^2 = 0.0986$                                     |
| R-factors, total                                        | $R^1 = 0.0489,$<br>$wR^2 = 0.1043$                                     |
| goodness of fit                                         | 0.994                                                                  |
| refine_ls_number_parameters                             | 346                                                                    |
| Index range                                             | $-33 \leq h \leq 33,$<br>$-21 \leq k \leq 20,$<br>$-23 \leq l \leq 23$ |
| Theta Min-Max [Deg]                                     | 1.9, 29.1                                                              |
| Min. and Max. Resd. Dens. [ $e \cdot \text{\AA}^{-3}$ ] | -1.57, 1.9                                                             |
| CCDC No                                                 | 2255352                                                                |

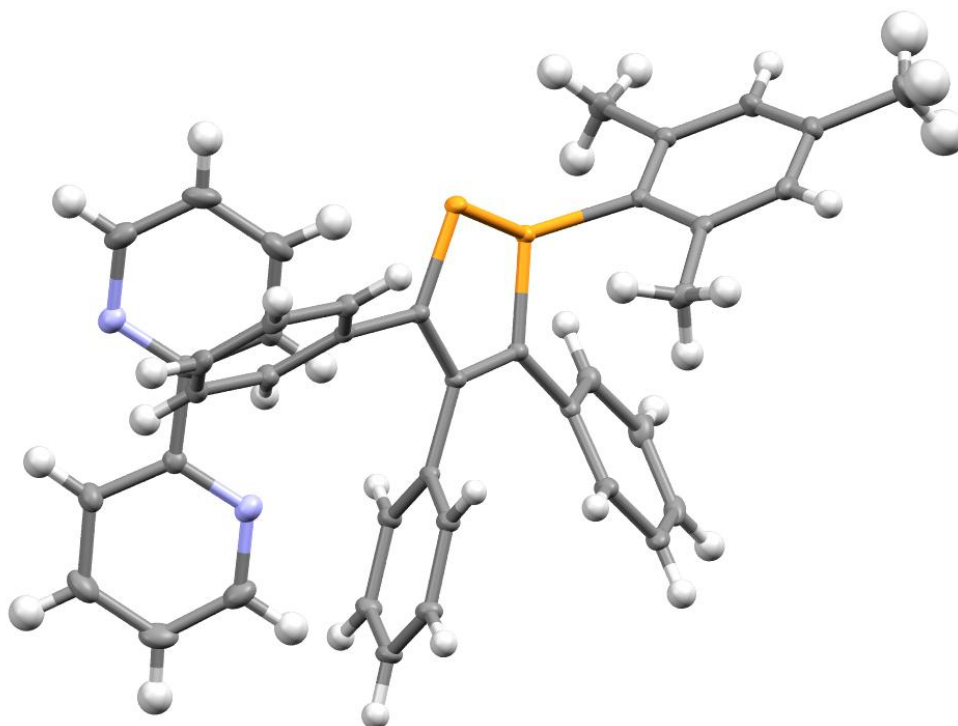

**Figure S16.** Geometry of the asymmetric part of the crystal of **4**. Ellipsoids of anisotropic displacements are shown with a probability 50%.

## 7. Solid-state excitation and emission spectra of compounds 4-6.

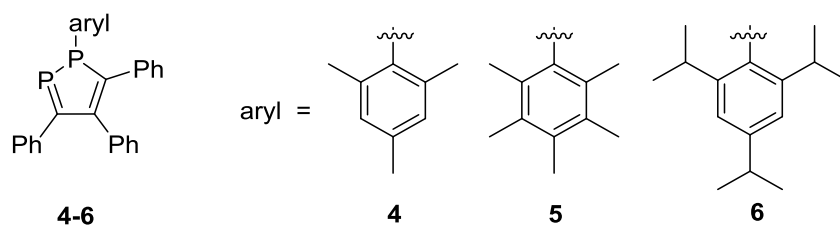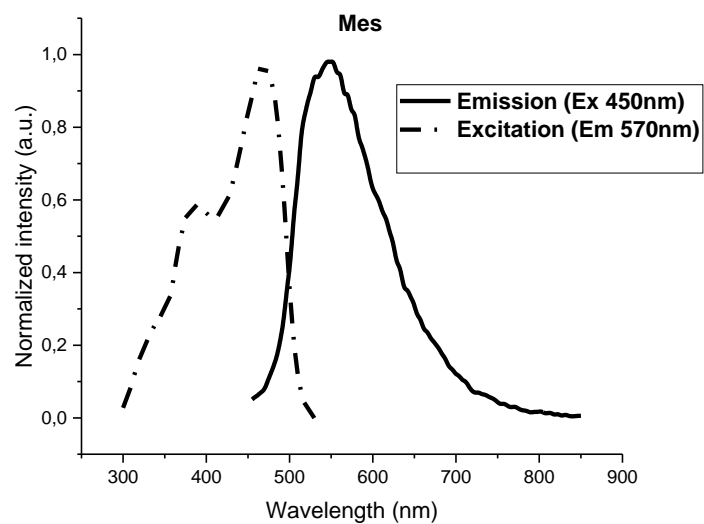

**Figure S17.** Solid-state excitation and emission spectra of compound **4**.

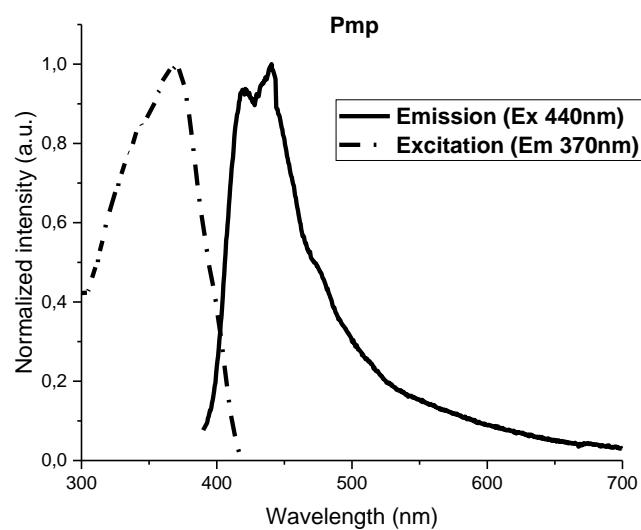

**Figure S18.** Solid-state excitation and emission spectra of compound **5**.

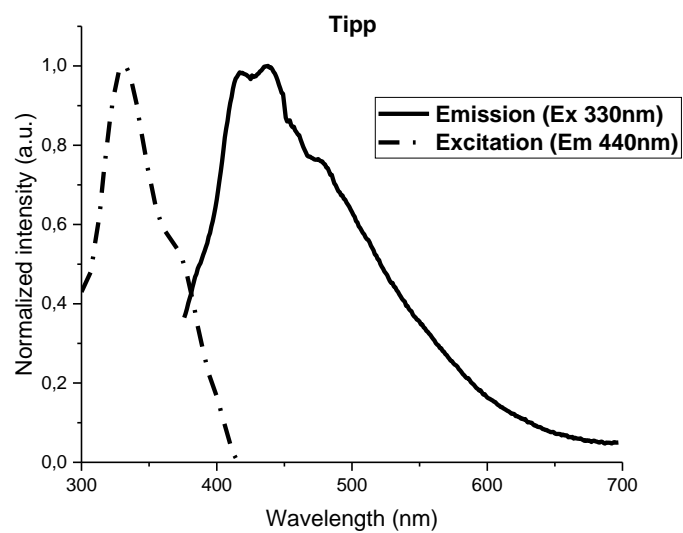

**Figure S19.** Solid-state excitation and emission spectra of compound **6**.



## 8. ESR spectra of obtained in the reaction Ni(0)-species.

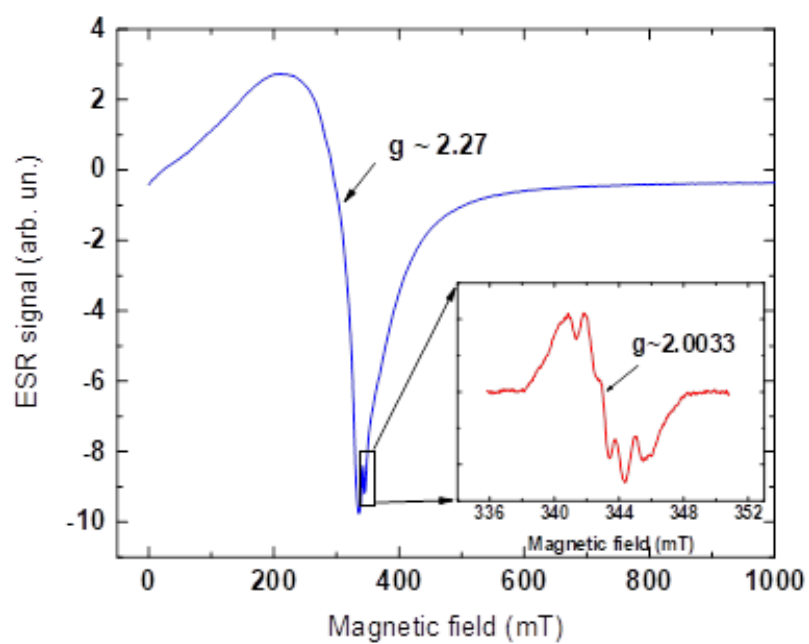

**Figure S20.** ESR spectrum recorded at ambient temperature. In the inset, another low intensity spectrum is shown.

## 9. ESI-MS of reaction intermediate (IM).

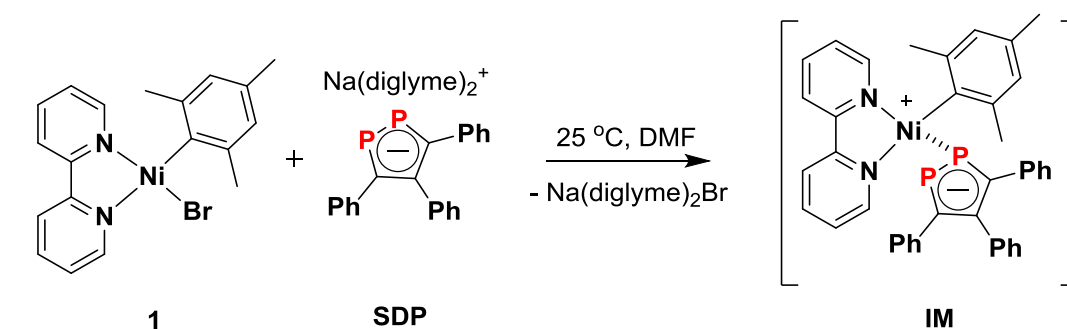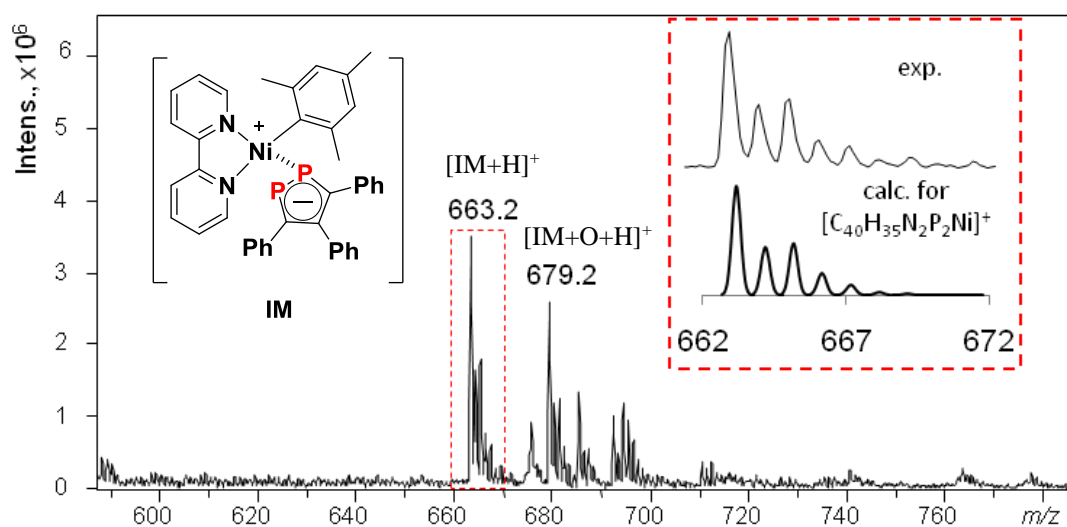

**Figure S21.** ESI mass spectrum of the reaction mixture (the mass range of 590-780).

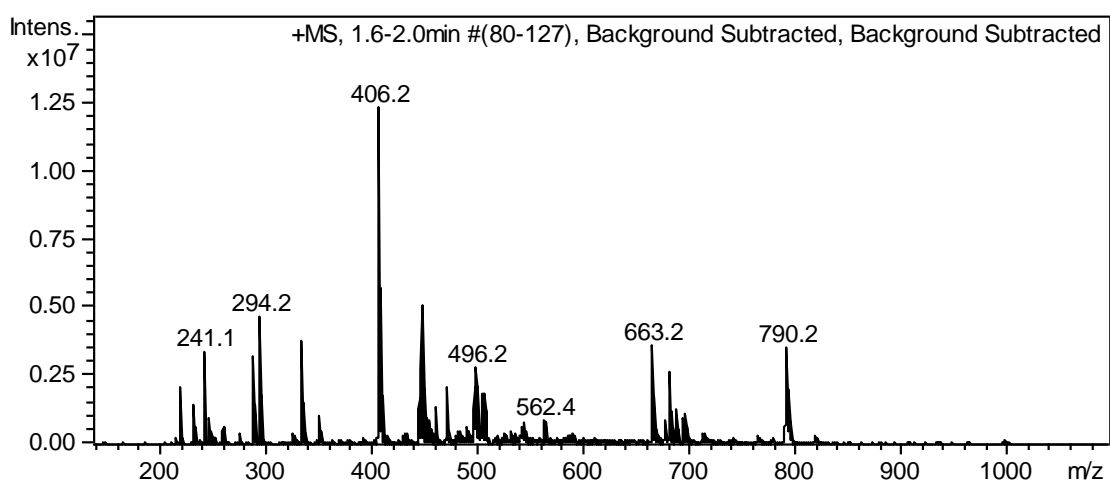

**Figure S22.** ESI mass spectrum of the reaction mixture (the mass range of 150-1100).

## 10. Quantum-chemical calculations.

**Table S2.** Computed free-energy profile and optimized structures of reactants (R), intermediates (IM) and transition states (TS) involved in the formation of 1-(2,4,6-trimethylphenyl)-3,4,5-triphenyl-1,2-diphosphole (**4**), along with spin-density distributions for triplet-state structures. Singlet-state paths and structures are marked in green, triplet-state ones – in red.

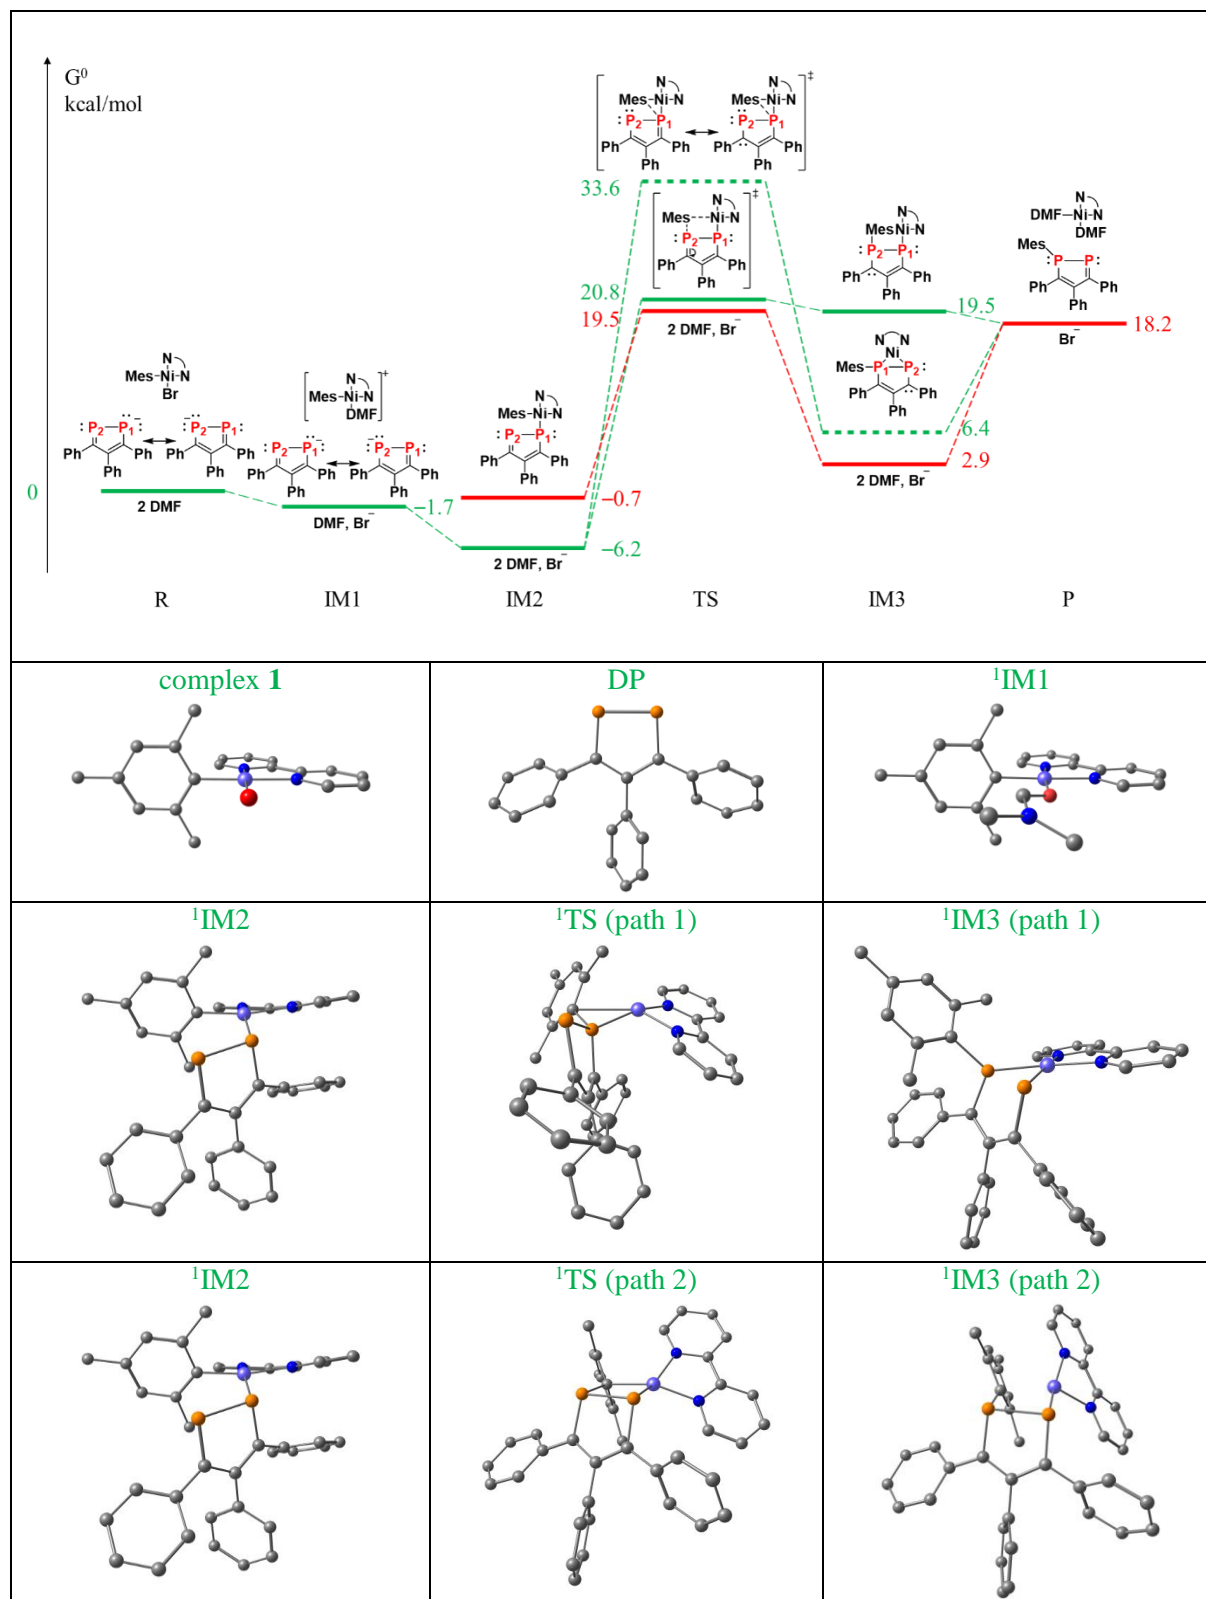

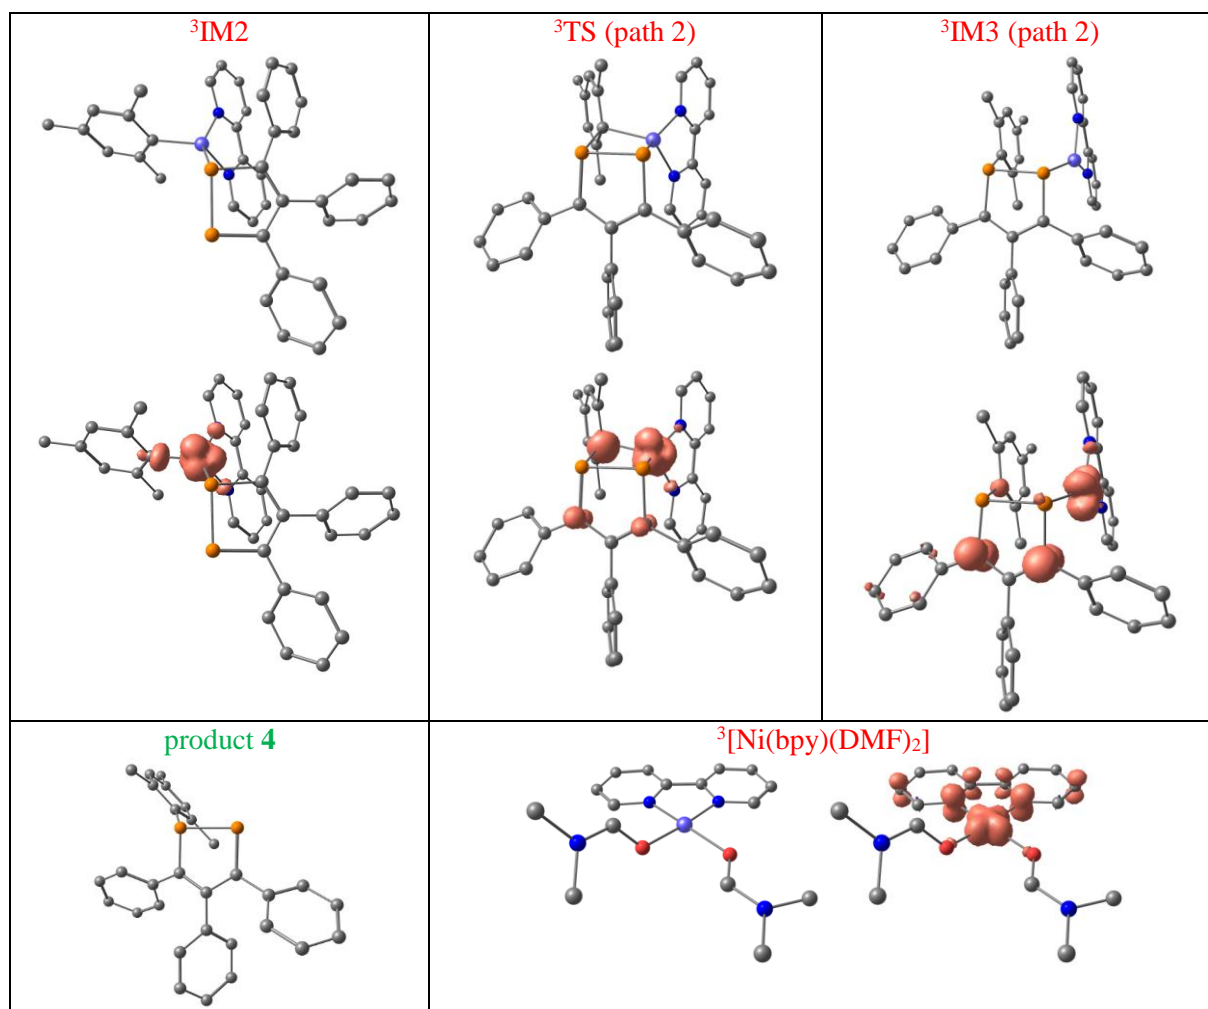

## References

- S1. Becke, A. D. Density-Functional Thermochemistry. III. The Role of Exact Exchange. *J. Chem. Phys.* **1993**, *98* (7), 5648–5652.
- S2. Stephens, P. J.; Devlin, F. J.; Chabalowski, C. F.; Frisch, M. J. Ab Initio Calculation of Vibrational Absorption and Circular Dichroism Spectra Using Density Functional Force Fields. *J. Phys. Chem.* **1994**, *98* (45), 11623–11627.
- S3. Lee, C.; Yang, W.; Parr, R. G. Development of the Colle-Salvetti Correlation-Energy Formula into a Functional of the Electron Density. *Phys. Rev. B* **1988**, *37* (2), 785–789.
- S4. Hay, P. J.; Wadt, W. R. Ab Initio Effective Core Potentials for Molecular Calculations. Potentials for the Transition Metal Atoms Sc to Hg. *J. Chem. Phys.* **1985**, *82* (1), 270–283.
- S5. Hratchian, H. P.; Schlegel, H. B. Finding Minima, Transition States, and Following Reaction Pathways on Ab Initio Potential Energy Surfaces. In *Theory and Applications of Computational Chemistry*; Dykstra, C. E., Ed.; Elsevier B.V.: Amsterdam, 2005; pp 243–249.
- S6. Fukui, K. The Path of Chemical Reactions - The IRC Approach. *Acc. Chem. Res.* **1981**, *14* (12), 363–368.
- S7. Grimme, S.; Antony, J.; Ehrlich, S.; Krieg, H. A Consistent and Accurate Ab Initio Parametrization of Density Functional Dispersion Correction (DFT-D) for the 94 Elements H-Pu. *J. Chem. Phys.* **2010**, *132* (15), 154104.
- S8. Grimme, S.; Ehrlich, S.; Goerigk, L. Effect of the Damping Function in Dispersion Corrected Density Functional Theory. *J. Comput. Chem.* **2011**, *32* (7), 1456–1465.
- S9. Frisch, M. J.; Trucks, G. W.; Schlegel, H. B.; Scuseria, G. E.; Robb, M. A.; Cheeseman, J. R.; Scalmani, G.; Barone, V.; Mennucci, B.; Petersson, G. A.; Nakatsuji, H.; Caricato, M.; Li, X.; Hratchian, H. P.; Izmaylov, A. F.; Bloino, J.; Zheng, G.; Sonnenberg, J. L.; Hada, M.; Ehara, M.; Toyota, K.; Fukuda, R.; Hasegawa, J.; Ishida, M.; Nakajima, T.; Honda, Y.; Kitao, O.; Nakai, H.; Vreven, T.; Montgomery Jr., J. A.; Peralta, J. E.; Ogliaro, F.; Bearpark, M.; Heyd, J. J.; Brothers, E.; Kudin, K. N.; Staroverov, V. N.; Keith, T.; Kobayashi, R.; Normand, J.; Raghavachari, K.; Rendell, A.; Burant, J. C.; Iyengar, S. S.; Tomasi, J.; Cossi, M.; Rega, N.; Millam, J. M.; Klene, M.; Knox, J. E.; Cross, J. B.; Bakken, V.; Adamo, C.; Jaramill, J.; Fox, D. J. Gaussian 09, Revision D.01. *Gaussian 09, Revision D.01, Gaussian, Inc., Wallingford CT*. Gaussian, Inc.: Wallingford CT 2009.
- S10. APEX2. Version 2.1, SAINTPlus. Data Reduction and Correction Program. Version 7.31A, Bruker Advanced X-ray Solutions, Bruker AXS Inc., Madison, Wisconsin, USA, 2006.
- S11. G.M. Sheldrick. SADABS, Program for empirical X-ray absorption correction. Bruker-Nonis, 1990–2004.
- S12. G.M. Sheldrick. SHELXT – Integrated space-group and crystal-structure determination. *Acta Crystallogr. A* **2015**, *71*, 3–8.

- S13. G.M. Sheldrick. *Acta Crystallogr. C*, **2015**, *71*, 3–8.
- S14. L.J. Farrugia. *Appl. Crystallogr.* **2012**, *45*, 849–854.
- S15. A.L. Spek. *Acta Crystallogr. D*. **2009**, *65*, 148–155.
- S16. C.F. Macrae, I. Sovago, S.J. Cottrell, P.T.A. Galek, P. McCabe, E. Pidcock, M. Platings, G.P. Shield, J.S. Stevens, M. Towler, P.A. Wood. *J. Appl. Crystallogr.* **2020**, *53*, 226–235.
- S17. Yakhvarov, D. G.; Khusnuriyalova, A. F.; Sinyashin, O. G. Electrochemical Synthesis and Properties of Organonickel  $\sigma^-$  Complexes. *Organometallics* **2014**, *33*, 4574–4589.
- S18. Bezkishko, I.; Miluykov, V.; Kataev, A.; Krivolapov, D.; Litvinov, I.; Sinyashin, O.; Hey-Hawkins, E. An unusual Reaction of Cyclopropenylphosphonium Bromide with Sodium Polyphosphides – A novel Approach to Sodium 3,4,5-triphenyl-1,2-diphosphacyclopentadienide. *J.Organomet.Chem.* **2008**, *693*, 3318–3320.
